# Supplementary material for: Animal protein-plant protein composite nanospheres for dual-drug loading and synergistic cancer therapy
Source: Royal Society of Chemistry journal article supplement (doi:10.1039/d2tb00368f), 2022-01-01
Supplement: d2tb00368f1.pdf [file d2tb00368f1.pdf]

## Supporting Information

### Animal Protein-Plant Protein Composite Nanospheres for Dual-Drug Loading and Synergistic Cancer Therapy

*Minqi Lu,<sup>†,#</sup> Mi Wu,<sup>†,#</sup> Yufang Huang,<sup>‡</sup> Jinrong Yao,<sup>†</sup> Zhengzhong Shao, Xin Chen<sup>†,\*</sup>*

<sup>†</sup>State Key Laboratory of Molecular Engineering of Polymers, Department of Macromolecular Science, Shanghai Stomatological Hospital & School of Stomatology, Laboratory of Advanced Materials, Fudan University, Shanghai, 200433, People's Republic of China

<sup>‡</sup>Department of Materials Science, Fudan University, Shanghai, 200433, People's Republic of China

\*E-mail: chenx@fudan.edu.cn

# M. L. and M. W. contribute equally to this work.

Number of pages: 2

Number of figures: 2

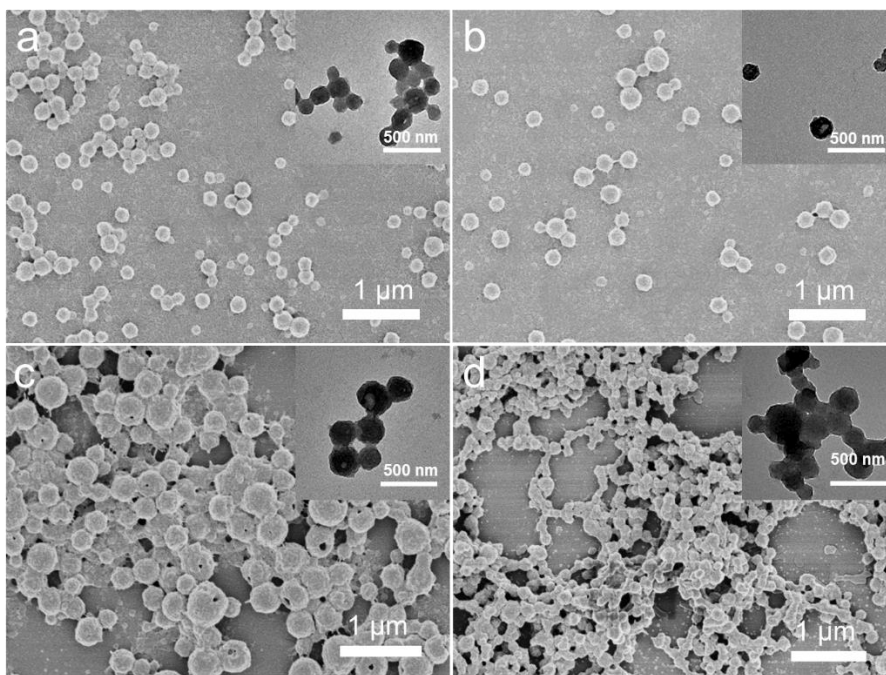

**Figure S1.** SEM images of RSF/zein nanospheres prepared at different RSF/zein mass ratio (insets are the corresponding TEM images). (a) 9:1, (b) 6:1, (c) 1:1, (d) 1:3.

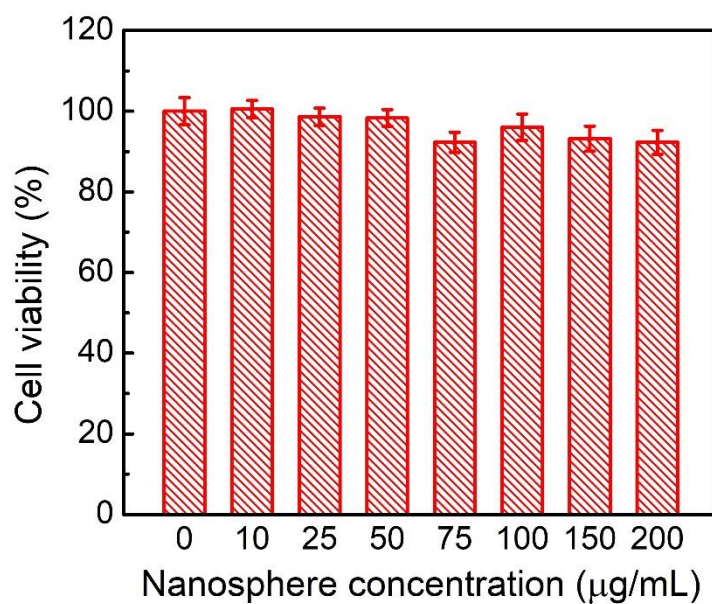

**Figure S2.** Cell viability of MCF-7 cells incubated with pristine RSF/zein nanospheres for 24 h.
